# Supplementary material
Source: PubMed Central journal article supplement (PMC5761913)
Supplement: Supplementary_Table_2.pdf [file Supplementary_Table_2.pdf]

**Table 2.** Histologic classification and c-Myc stain for 18 patients with gain of chromosome 8q.

|    | Sex | Age | Grade | Tumor Histology Type | Presence of coagulative necrosis | Sarcomatoid /Rhabdoid | c-Myc Stain | % c-Myc Stain |
|----|-----|-----|-------|----------------------|----------------------------------|-----------------------|-------------|---------------|
| 1  | F   | 61  | High  | Clear Cell           | Y                                | Y                     | Y           | 8             |
| 2  | M   | 61  | High  | Clear Cell           | N                                | Y                     | *           | -             |
| 3  | F   | 72  | High  | Clear Cell           | Y                                | Y                     | Y           | 60            |
| 4  | F   | 36  | Low   | Papillary            | N                                | N                     | Y           | 45            |
| 5  | M   | 53  | High  | Clear Cell           | Y                                | Y                     | Y           | 35            |
| 6  | M   | 61  | Low   | Clear Cell           | N                                | Y                     | Y           | 60            |
| 7  | M   | 62  | High  | Papillary            | N                                | N                     | Y           | 30            |
| 8  | M   | 68  | High  | Papillary            | N                                | Y                     | Y           | 10            |
| 9  | M   | 43  | High  | Papillary            | Y                                | Y                     | Y           | 70            |
| 10 | M   | 72  | High  | Papillary            | N                                | N                     | *           | -             |
| 11 | M   | 74  | Low   | Papillary            | Y                                | N                     | *           | -             |
| 12 | F   | 52  | High  | Clear Cell           | N                                | N                     | *           | -             |
| 13 | M   | 72  | High  | Papillary            | Y                                | Y                     | *           | -             |
| 14 | M   | 60  | High  | Clear Cell           | N                                | N                     | *           | -             |
| 15 | M   | 63  | High  | Papillary            | N                                | N                     | *           | -             |
| 16 | M   | 51  | High  | Clear Cell           | Y                                | N                     | Y           | 60            |
| 17 | M   | 39  | High  | Papillary            | N                                | N                     | Y           | 80            |
| 18 | M   | 67  | High  | Clear Cell           | Y                                | Y                     | Y           | 55            |

\* Blocks not available for c-Myc Stain.
